# Supplementary material for: Cumulative Exposure to Ideal Cardiovascular Health and Incident Diabetes in a Chinese Population: The Kailuan Study
Source: PubMed Central journal article supplement — J Am Heart Assoc. 2016 Sep 16;5(9):e004132. doi: 10.1161/JAHA.116.004132 (PMC5079052; doi:10.1161/jaha.116.004132), 2016-09-16
Supplement: JAH3-5-e004132-s001.pdf [file JAH3-5-e004132-s001.pdf]

## SUPPLEMENTAL MATERIAL

**Table S1. The percentages of each of the seven cardiovascular health indices according to cumulative exposure of CVH.**

| CVH metrics          | Group of cumulative exposure of CVH |       |       |       |       |                |       |       |       |       |       |                |
|----------------------|-------------------------------------|-------|-------|-------|-------|----------------|-------|-------|-------|-------|-------|----------------|
|                      | Women                               |       |       |       |       |                | Men   |       |       |       |       |                |
|                      | Q1                                  | Q2    | Q3    | Q4    | Q5    | <i>P</i> value | Q1    | Q2    | Q3    | Q4    | Q5    | <i>P</i> value |
| Smoking, %           |                                     |       |       |       |       | <0.001         |       |       |       |       |       | <0.001         |
| Ideal                | 92.24                               | 97.39 | 97.31 | 98.73 | 99.65 |                | 23.71 | 41.72 | 53.80 | 65.60 | 77.22 |                |
| Intermediate         | 2.59                                | 0.87  | 1.31  | 0.68  | 0.23  |                | 9.95  | 12.06 | 12.24 | 11.60 | 10.57 |                |
| Poor                 | 5.18                                | 1.74  | 1.38  | 0.59  | 0.12  |                | 66.33 | 46.21 | 33.96 | 22.80 | 12.21 |                |
| Body mass index, %   |                                     |       |       |       |       | <0.001         |       |       |       |       |       | <0.001         |
| Ideal                | 8.00                                | 21.61 | 41.95 | 63.23 | 85.90 |                | 26.00 | 43.19 | 55.22 | 66.55 | 82.80 |                |
| Intermediate         | 52.00                               | 56.35 | 49.09 | 33.86 | 13.14 |                | 56.00 | 50.02 | 41.27 | 31.83 | 16.68 |                |
| Poor                 | 40.00                               | 22.04 | 8.96  | 2.91  | 0.96  |                | 18.00 | 6.80  | 3.51  | 1.63  | 0.53  |                |
| Physical activity, % |                                     |       |       |       |       | <0.001         |       |       |       |       |       | <0.001         |
| Ideal                | 10.12                               | 9.88  | 9.18  | 10.26 | 15.84 |                | 8.62  | 10.55 | 12.49 | 16.98 | 26.81 |                |
| Intermediate         | 80.47                               | 82.63 | 83.90 | 84.34 | 81.57 |                | 74.51 | 77.96 | 78.66 | 76.62 | 68.69 |                |
| Poor                 | 9.41                                | 7.49  | 6.92  | 5.40  | 2.59  |                | 16.87 | 11.49 | 8.85  | 6.39  | 4.50  |                |
| Salt intake, %       |                                     |       |       |       |       | <0.001         |       |       |       |       |       | <0.001         |
| ideal                | 5.65                                | 5.65  | 5.61  | 7.35  | 12.85 |                | 5.98  | 7.57  | 9.38  | 10.44 | 15.60 |                |
| Intermediate         | 77.65                               | 82.74 | 84.49 | 86.65 | 83.63 |                | 72.06 | 80.57 | 82.75 | 83.47 | 79.61 |                |
| Poor                 | 16.71                               | 11.62 | 9.91  | 5.99  | 3.52  |                | 21.96 | 11.86 | 7.87  | 6.09  | 4.79  |                |
| Total cholesterol, % |                                     |       |       |       |       | <0.001         |       |       |       |       |       | <0.001         |
| Ideal                | 21.41                               | 39.20 | 52.80 | 64.32 | 77.94 |                | 39.52 | 59.76 | 69.82 | 76.54 | 84.11 |                |

|                          |       |       |       |       |       |        |       |       |       |       |       |        |
|--------------------------|-------|-------|-------|-------|-------|--------|-------|-------|-------|-------|-------|--------|
| Intermediate             | 41.18 | 38.44 | 34.74 | 27.87 | 18.84 |        | 38.52 | 30.74 | 25.31 | 19.86 | 14.57 |        |
| Poor                     | 37.41 | 22.37 | 12.45 | 7.81  | 3.23  |        | 21.96 | 9.51  | 4.86  | 3.60  | 1.31  |        |
| Blood pressure, %        |       |       |       |       |       | <0.001 |       |       |       |       |       | <0.001 |
| Ideal                    | 5.65  | 11.83 | 21.49 | 33.09 | 55.32 |        | 10.86 | 17.66 | 20.83 | 25.43 | 35.08 |        |
| Intermediate             | 46.82 | 54.94 | 59.14 | 57.10 | 40.76 |        | 54.65 | 57.50 | 58.77 | 60.15 | 57.97 |        |
| Poor                     | 47.53 | 33.22 | 19.37 | 9.80  | 3.92  |        | 34.49 | 24.83 | 20.40 | 14.41 | 6.95  |        |
| Fasting blood glucose, % |       |       |       |       |       | <0.001 |       |       |       |       |       | <0.001 |
| Ideal                    | 80.47 | 82.84 | 86.02 | 87.38 | 89.45 |        | 75.37 | 78.62 | 79.84 | 81.15 | 84.61 |        |
| Intermediate             | 19.53 | 17.16 | 13.98 | 12.62 | 10.55 |        | 24.64 | 21.38 | 20.16 | 18.85 | 15.39 |        |
| Poor                     | --    | --    | --    | --    | --    |        | --    | --    | --    | --    | --    |        |

Abbreviation: CVH, ideal cardiovascular health; Q1=quintile1, Q2=quintile2, Q3=quintile3, Q4=quintile4, Q5=quintile5.

**Table S2. Odds ratios and 95% confidence intervals of diabetes according to the time weighted cumulative exposure of CVH.**

|                    | Group of cumulative exposure of CVH |                 |                 |                 |                 | One score increase | P for trend |
|--------------------|-------------------------------------|-----------------|-----------------|-----------------|-----------------|--------------------|-------------|
|                    | Q1                                  | Q2              | Q3              | Q4              | Q5              |                    |             |
| Total, n           | 6864                                | 6865            | 6865            | 6865            | 6864            |                    |             |
| Case number, n (%) | 426(6.21)                           | 311(4.53)       | 255(3.71)       | 186(2.71)       | 123(1.79)       |                    |             |
| Model 1 *          | 1.00                                | 0.68(0.59-0.80) | 0.55(0.47-0.65) | 0.39(0.32-0.47) | 0.26(0.22-0.33) | 0.73(0.70-0.76)    | <0.001      |
| Model 2 †          | 1.00                                | 0.67(0.58-0.78) | 0.54(0.46-0.63) | 0.38(0.31-0.45) | 0.26(0.21-0.32) | 0.72(0.69-0.76)    | <0.001      |
| Model 3 ‡          | 1.00                                | 0.72(0.62-0.85) | 0.60(0.51-0.71) | 0.42(0.35-0.52) | 0.29(0.23-0.37) | 0.76(0.72-0.79)    | <0.001      |
| Sex                |                                     |                 |                 |                 |                 |                    |             |
| Women,             | 39(7.75)                            | 54(5.91)        | 63(4.95)        | 58(2.88)        | 61(1.67)        |                    |             |
| Model 3 ‡          | 1.00                                | 0.94(0.59-1.50) | 0.92(0.58-1.45) | 0.58(0.36-0.93) | 0.37(0.22-0.62) | 0.75(0.67-0.84)    | <0.001      |
| Men                | 387(6.08)                           | 257(4.32)       | 192(3.43)       | 128(2.64)       | 62(1.94)        |                    |             |
| Model 3 ‡          | 1.00                                | 0.70(0.59-0.83) | 0.56(0.46-0.68) | 0.41(0.33-0.51) | 0.31(0.23-0.41) | 0.76(0.72-0.80)    | <0.001      |
| P-interaction      |                                     | 0.321           | 0.105           | 0.413           | 0.933           |                    |             |
| Age ,years         |                                     |                 |                 |                 |                 |                    |             |
| <40ys              | 63(4.13)                            | 39(2.67)        | 21(1.38)        | 15(0.91)        | 15(0.61)        |                    |             |
| Model 3 ‡          | 1.00                                | 0.74(0.49-1.13) | 0.39(0.23-0.66) | 0.26(0.14-0.48) | 0.18(0.09-0.35) | 0.70(0.62-0.80)    | <0.001      |
| 40-59ys            | 304(6.55)                           | 216(4.88)       | 181(4.15)       | 126(3.03)       | 80(2.25)        |                    |             |
| Model 3 ‡          | 1.00                                | 0.75(0.62-0.91) | 0.65(0.53-0.80) | 0.47(0.37-0.60) | 0.32(0.24-0.43) | 0.78(0.74-0.83)    | <0.001      |
| P-interaction      |                                     | 0.648           | 0.023           | 0.017           | 0.015           |                    |             |
| ≥60ys              | 59(8.44)                            | 56(5.73)        | 53(5.42)        | 45(4.25)        | 28(3.24)        |                    |             |
| Model 3 ‡          | 1.00                                | 0.67(0.45-1.01) | 0.66(0.44-1.00) | 0.46(0.29-0.72) | 0.42(0.25-0.70) | 0.76(0.68-0.86)    | <0.001      |
| P-interaction      |                                     | 0.988           | 0.046           | 0.048           | 0.006           |                    |             |

Abbreviation: CVH, ideal cardiovascular health; time weighted cumulative exposure of CVH:  $(CVH_1 \times \text{time}_{1-2} + CVH_2 \times \text{time}_{2-3} + CVH_3 \times \text{time}_{3-4}) / (\text{time}_{1-2} + \text{time}_{2-3} + \text{time}_{3-4})$ . Q1=quintile1, Q2=quintile2, Q3=quintile3, Q4=quintile4, Q5=quintile5.

\* Adjusted for age (years), sex.

† Adjusted for as model 1 plus education level (elementary school, high school or college or above), income level (income $\geq$ 800 ¥/month, ¥600-800, and income $<$ 600 ¥/month) and drinking (never, past, current,  $<$ 1times/d or current, 1+times/d).

‡ Adjusted for as model 2 plus High sensitive C-reactive protein, uric acid, resting heart rate at exam1, and medication usage before exam4.

**Table S3.Odds ratios and 95% confidence intervals of diabetes (exam2) in relation to quintile increase of baseline exposure of CVH (exam1).**

|                    | Group of baseline exposure of CVH |                 |                 |                 |                 | One score increase | P for trend |
|--------------------|-----------------------------------|-----------------|-----------------|-----------------|-----------------|--------------------|-------------|
|                    | Q1                                | Q2              | Q3              | Q4              | Q5              |                    |             |
| Total, n           | 10422                             | 10218           | 13701           | 14016           | 16817           |                    |             |
| Case number, n (%) | 794(7.61)                         | 623(6.10)       | 677(4.94)       | 583(4.16)       | 437(2.60)       |                    |             |
| Model 1 *          | 1.00                              | 0.77(0.69-0.86) | 0.61(0.55-0.68) | 0.52(0.46-0.58) | 0.35(0.31-0.39) | 0.82(0.80-0.83)    | <0.001      |
| Model 2 †          | 1.00                              | 0.75(0.67-0.83) | 0.58(0.52-0.64) | 0.48(0.43-0.54) | 0.32(0.28-0.36) | 0.80(0.78-0.82)    | <0.001      |
| Model 3 ‡          | 1.00                              | 0.79(0.70-0.88) | 0.62(0.55-0.69) | 0.53(0.47-0.60) | 0.36(0.32-0.41) | 0.82(0.80-0.84)    | <0.001      |
| Sex                |                                   |                 |                 |                 |                 |                    |             |
| Women,             | 49(9.42)                          | 99(8.82)        | 94(4.13)        | 124(3.75)       | 119(1.68)       |                    |             |
| Model 3 ‡          | 1.00                              | 1.11(0.75-1.64) | 0.53(0.36-0.79) | 0.61(0.42-0.89) | 0.37(0.25-0.54) | 0.79(0.74-0.84)    | <0.001      |
| Men                | 745(7.52)                         | 524(5.76)       | 583(5.10)       | 459(4.29)       | 318(3.27)       |                    |             |
| Model 3 ‡          | 1.00                              | 0.75(0.67-0.85) | 0.64(0.56-0.72) | 0.52(0.46-0.60) | 0.40(0.34-0.46) | 0.84(0.81-0.86)    | <0.001      |
| P-interaction      |                                   | 0.143           | 0.131           | 0.746           | 0.035           |                    |             |
| Age ,years         |                                   |                 |                 |                 |                 |                    |             |
| <40ys              | 65(4.01)                          | 46(2.73)        | 67(2.98)        | 43(1.59)        | 40(0.84)        |                    |             |
| Model 3 ‡          | 1.00                              | 0.73(0.49-1.08) | 0.87(0.60-1.25) | 0.49(0.32-0.75) | 0.35(0.22-0.55) | 0.84(0.77-0.90)    | <0.001      |
| 40-59ys            | 593(8.11)                         | 417(6.26)       | 416(4.79)       | 363(4.31)       | 272(2.94)       |                    |             |
| Model 3 ‡          | 1.00                              | 0.77(0.67-0.88) | 0.57(0.50-0.66) | 0.52(0.45-0.60) | 0.38(0.32-0.45) | 0.82(0.80-0.85)    | <0.001      |
| P-interaction      |                                   | 0.552           | 0.167           | 0.188           | 0.024           |                    |             |
| ≥60ys              | 136(9.07)                         | 160(8.55)       | 194(6.99)       | 177(6.16)       | 125(4.46)       |                    |             |
| Model 3 ‡          | 1.00                              | 0.94(0.74-1.22) | 0.75(0.59-0.96) | 0.67(0.52-0.86) | 0.47(0.36-0.62) | 0.86(0.82-0.90)    | <0.001      |
| P-interaction      |                                   | 0.148           | 0.947           | 0.018           | 0.002           |                    |             |

Abbreviation: CVH, ideal cardiovascular health; Q1=quintile1, Q2=quintile2, Q3=quintile3, Q4=quintile4, Q5=quintile5.

\* Adjusted for age (years), sex.

† Adjusted for as model 1 plus education level (elementary school, high school or college or above), income level (income  $\geq$  800 ¥/month, ¥600-800, and income < 600 ¥/month) and drinking (never, past, current, < 1 times/d or current, 1+ times/d).

‡ Adjusted for as model 2 plus High sensitive C-reactive protein, uric acid, resting heart rate, and medication usage at exam 1.

**TableS4. Comparison of Demographic and Other Characteristics of Participants and Non-Participants**

|                                                        | <b>Participants</b> | <b>Non-Participants</b> | <b>P-Value</b> |
|--------------------------------------------------------|---------------------|-------------------------|----------------|
| <b>n</b>                                               | 34323               | 52764                   |                |
| Age (Years)                                            | 47.43 ± 11.62       | 53.85 ± 12.97           | <0.001         |
| Male Sex, n (%)                                        | 25961 (75.64)       | 43174(81.82)            | <0.001         |
| High School Educational Level or above, n (%)          | 8147 (23.75)        | 9289 (18.80)            | <0.001         |
| Income ≥¥800/month, n (%)                              | 5140 (14.98)        | 6896(13.97)             | <0.001         |
| Current Smoker, n (%)                                  | 10438(30.41)        | 15647 (31.28)           | <0.001         |
| Current Alcohol Drinker, n (%)                         | 5932 (17.29)        | 9108 (18.19)            | <0.001         |
| Physical Activity ≥80 min, n (%)                       | 4609 (13.43)        | 8092 (16.44)            | <0.001         |
| High Salt Intake, n (%)                                | 3566 (10.39)        | 5352 (10.86)            | 0.058          |
| Body Mass Index (kg/m <sup>2</sup> )                   | 24.89 ±3.42         | 24.81 ± 3.47            | <0.001         |
| Systolic Blood Pressure (mmHg)                         | 127.02 ± 19.30      | 131.66 ± 21.40          | <0.001         |
| Diastolic Blood Pressure (mmHg)                        | 82.20 ± 11.26       | 83.54 ± 11.89           | <0.001         |
| Fasting Blood Glucose Concentration (mmol/l)           | 5.02 ± 0.65         | 5.06 ± 0.69             | <0.001         |
| Total Cholesterol Concentration (mmol/l)               | 4.87 ± 1.13         | 4.93 ± 1.11             | <0.001         |
| High-Sensitive C-Reactive Protein Concentration (mg/L) | 0.68 (0.25-1.80)    | 0.85 (0.30-2.30)        | <0.001         |
| Uric Acid Concentration (μmol/L)                       | 283.83 ± 81.52      | 294.79 ± 84.41          | <0.001         |
| Resting Heart Rate (Beats / Minute)                    | 73.15 ± 9.64        | 73.47 ± 10.14           | 0.048          |

**Table S5. Previous analyses of the relationship between ideal cardiovascular health metrics and risk of outcomes.**

| <b>Study (Author, Year)</b>          | <b>Journal, publication date</b>                 | <b>Name of Cohort(s)</b>                 | <b>Location</b> | <b>Baseline Year</b> | <b>Participants</b> | <b>Outcomes</b>                                                                                  | <b>Follow Up (Years)</b> |
|--------------------------------------|--------------------------------------------------|------------------------------------------|-----------------|----------------------|---------------------|--------------------------------------------------------------------------------------------------|--------------------------|
| Shah AM <sup>1</sup> , 1987          | Circulation, 2015                                | ARIC study                               | United States   | 1987-1989            | 15,792 individuals  | cardiovascular structure and function                                                            | 25                       |
| Sping B <sup>2</sup> , 1985          | Circulation 2014;130:10-17                       | CARDIA Study                             | United States   | 1985-1986            | 5115 adults         | Coronary artery calcification and carotid intima-media thickness                                 | 20                       |
| Xanthakis V <sup>3</sup> , 1995      | Circulation 2014;130:1676-1683                   | Framingham Offspring Study               | United States   | 1995-1998            | 2680 participants   | CVD biomarker levels and subclinical disease                                                     | 0                        |
| Pahkala K <sup>4</sup> , 1990        | Circulation 2013;127:2088-2096                   | STRIP study                              | Finland         | 1990-1992            | 1062 infants        | Vascular intima-media thickness and elasticity                                                   | 20                       |
| Aatola H <sup>5</sup> , 1980         | Journal of the American Heart Association 2014;3 | Cardiovascular Risk in Young Finns Study | Finland         | 1986                 | 1143 white adults   | pulse wave velocity                                                                              | 21                       |
| Tomi T. Laitinen <sup>6</sup> , 1980 | Circulation 2012;125:1971-1978                   | Cardiovascular Risk in Young Finns Study | Finland         | 1986                 | 856 subjects        | cardiometabolic outcomes hypertension, metabolic syndrome, carotid artery intima-media thickness | 21                       |
| Qian Zhang <sup>7</sup> , 2006       | Stroke 2013;44:2451-2456                         | Kailuan study                            | China           | 2006                 | 101510 subjects     | stroke                                                                                           | 4                        |
| Chuanhui Dong <sup>8</sup> , 1993    | Circulation 2012;125:2975-2984                   | Northern Manhattan Study                 | United States   | 1993                 | 2981 subjects       | Myocardial Infarction, Stroke, and Vascular Death                                                | 11                       |



|                                               |                                                       |                                                  |               |           |                 |                                                                  |       |
|-----------------------------------------------|-------------------------------------------------------|--------------------------------------------------|---------------|-----------|-----------------|------------------------------------------------------------------|-------|
| Shouling Wu <sup>9</sup> ,2006                | Circ Cardiovasc Qual Outcomes 2012;5:487-493          | Kailuan study                                    | China         | 2006      | 101510 subjects | Cardiovascular Events                                            | 4     |
| Laura J. Rasmussen Torvik <sup>10</sup> ,1987 | Circulation 2013;127:1270-1275                        | ARIC study                                       | United States | 1987-1989 | 13,253 subjects | cancer                                                           | 17-19 |
| Earl S. Ford <sup>11</sup> ,1999              | Circulation 2012;125:987-995                          | National Health and Nutrition Examination Survey | United States | 1999-2002 | 7622 adults     | Mortality From All Causes and Diseases of the Circulatory System | 5.8   |
| Enrique G. Artero <sup>12</sup> ,1987         | Mayo Clinic proceedings. Mayo Clinic. 2012;87:944-952 | Aerobics Center Longitudinal Study               | United States | 1987-1999 | 11993 subjects  | deaths from all causes, cardiovascular disease (CVD), and cancer | 11.6  |

## References

1. Shah AM, Claggett B, Folsom AR, Lutsey PL, Ballantyne CM, Heiss G, Solomon SD. Ideal cardiovascular health during adult life and cardiovascular structure and function among the elderly. *Circulation*. 2015;132:1979-1989
2. Spring B, Moller AC, Colangelo LA, Siddique J, Roehrig M, Daviglius ML, Polak JF, Reis JP, Sidney S, Liu K. Healthy lifestyle change and subclinical atherosclerosis in young adults: Coronary artery risk development in young adults (cardia) study. *Circulation*. 2014;130:10-17
3. Xanthakis V, Enserro DM, Murabito JM, Polak JF, Wollert KC, Januzzi JL, Wang TJ, Tofler G, Vasan RS. Ideal cardiovascular health: Associations with biomarkers and subclinical disease and impact on incidence of cardiovascular disease in the framingham offspring study. *Circulation*. 2014;130:1676-1683
4. Pahkala K, Hietalampi H, Laitinen TT, Viikari JS, Ronnema T, Niinikoski H, Lagstrom H, Talvia S, Jula A, Heinonen OJ, Juonala M, Simell O, Raitakari OT. Ideal cardiovascular health in adolescence: Effect of lifestyle intervention and association with vascular intima-media thickness and elasticity (the special turku coronary risk factor intervention project for children [strip] study). *Circulation*. 2013;127:2088-2096

5. Aatola H, Hutri-Kahonen N, Juonala M, Laitinen TT, Pahkala K, Mikkilä V, Telama R, Koivisto T, Lehtimäki T, Viikari JS, Raitakari OT, Kahonen M. Prospective relationship of change in ideal cardiovascular health status and arterial stiffness: The cardiovascular risk in young finns study. *J Am Heart Assoc.* 2014;3:e000532
6. Laitinen TT, Pahkala K, Magnussen CG, Viikari JS, Oikonen M, Taittonen L, Mikkilä V, Jokinen E, Hutri-Kahonen N, Laitinen T, Kahonen M, Lehtimäki T, Raitakari OT, Juonala M. Ideal cardiovascular health in childhood and cardiometabolic outcomes in adulthood: The cardiovascular risk in young finns study. *Circulation.* 2012;125:1971-1978
7. Zhang Q, Zhou Y, Gao X, Wang C, Zhang S, Wang A, Li N, Bian L, Wu J, Jia Q, Wu S, Zhao X. Ideal cardiovascular health metrics and the risks of ischemic and intracerebral hemorrhagic stroke. *Stroke.* 2013;44:2451-2456
8. Dong C, Rundek T, Wright CB, Anwar Z, Elkind MS, Sacco RL. Ideal cardiovascular health predicts lower risks of myocardial infarction, stroke, and vascular death across whites, blacks, and hispanics: The northern manhattan study. *Circulation.* 2012;125:2975-2984
9. Wu S, Huang Z, Yang X, Zhou Y, Wang A, Chen L, Zhao H, Ruan C, Wu Y, Xin A, Li K, Jin C, Cai J. Prevalence of ideal cardiovascular health and its relationship with the 4-year cardiovascular events in a northern chinese industrial city. *Circ Cardiovasc Qual Outcomes.* 2012;5:487-493
10. Rasmussen-Torvik LJ, Shay CM, Abramson JG, Friedrich CA, Nettleton JA, Prizment AE, Folsom AR. Ideal cardiovascular health is inversely associated with incident cancer: The atherosclerosis risk in communities study. *Circulation.* 2013;127:1270-1275
11. Ford ES, Greenlund KJ, Hong Y. Ideal cardiovascular health and mortality from all causes and diseases of the circulatory system among adults in the united states. *Circulation.* 2012;125:987-995
12. Artero EG, Espana-Romero V, Lee DC, Sui X, Church TS, Lavie CJ, Blair SN. Ideal cardiovascular health and mortality: Aerobics center longitudinal study. *Mayo Clin Proc.* 2012;87:944-952
